# Supplementary material
Source: MDPI journal article supplement (https://www.mdpi.com/2411-5134/3/2/29)
Supplement: s1 [file s1]

# Supplementary Materials

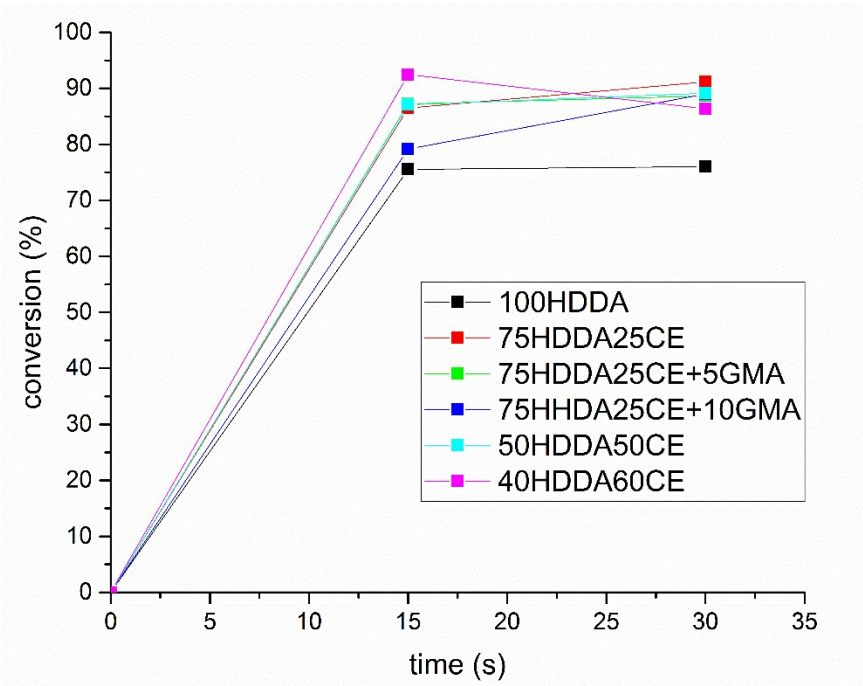

Figure S1. Conversion vs. time of the acrylic groups during visible light irradiation.

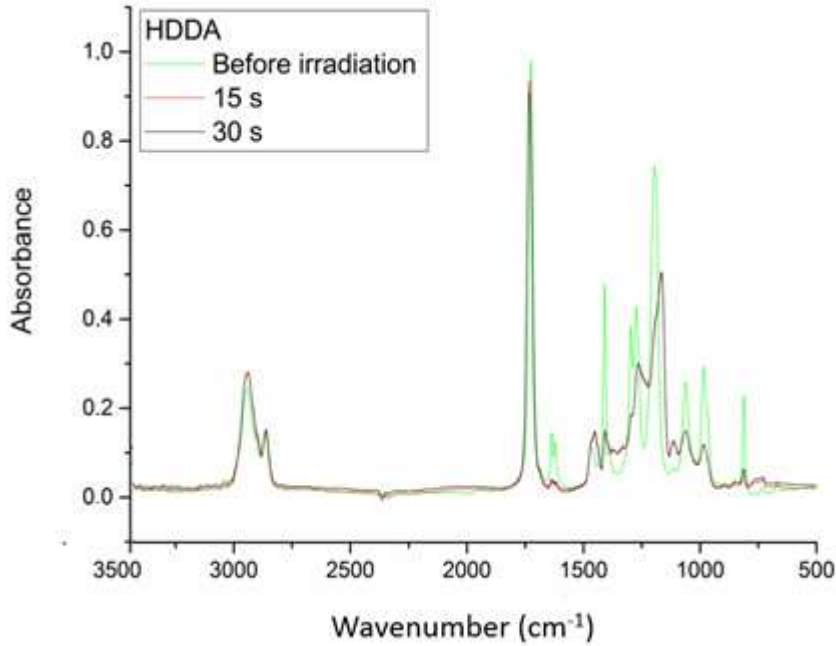

Figure S2. A FT-IR spectra of sample HDDA at different irradiation times under visible light (15 and 30 s of visible light irradiation).

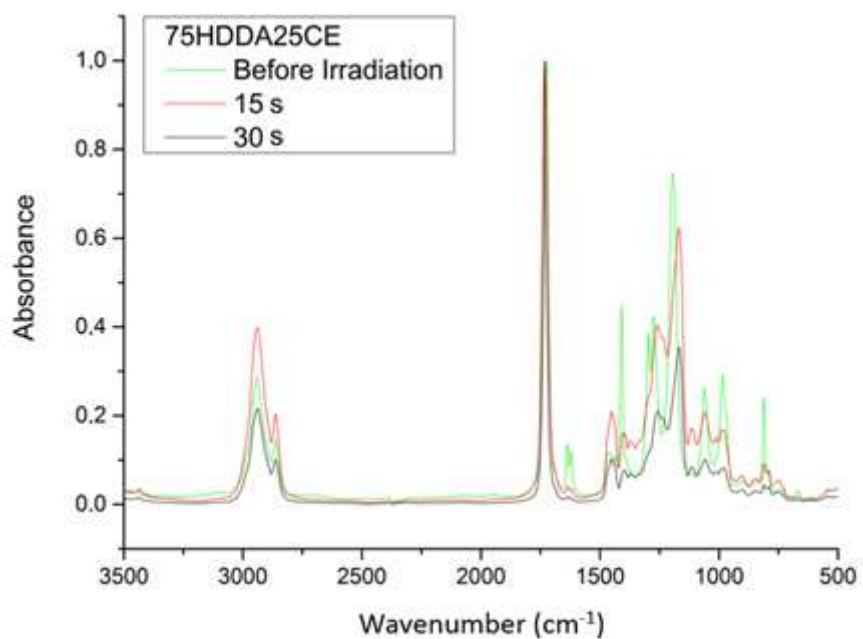

**Figure S3.** FT-IR spectra of sample 75HDDA 25CE at different irradiation times under visible light (15 and 30 s of visible light irradiation).

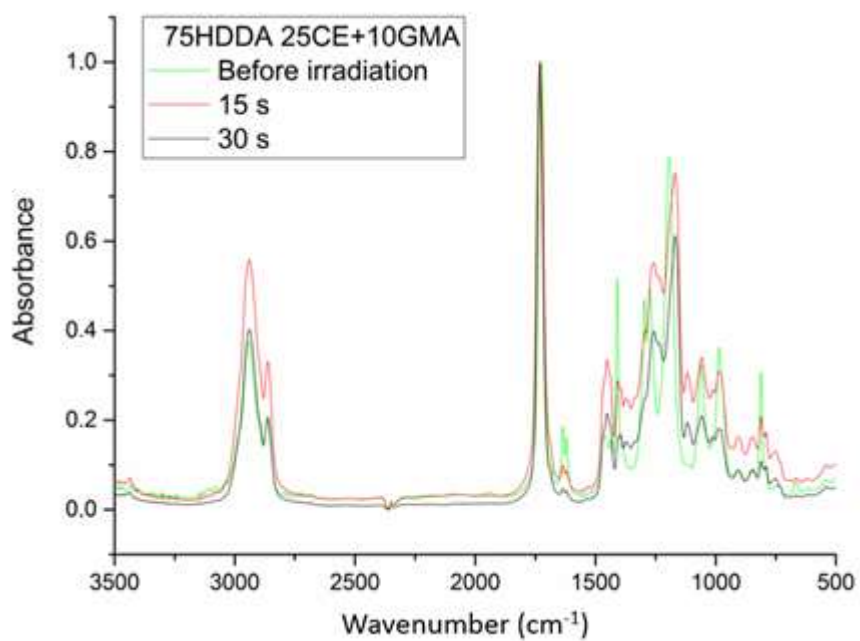

**Figure S4.** FT-IR spectra of sample 75HDDA 25 CE also containing 10% of GMA at different irradiation times under visible light (15 and 30 s of visible light irradiation).

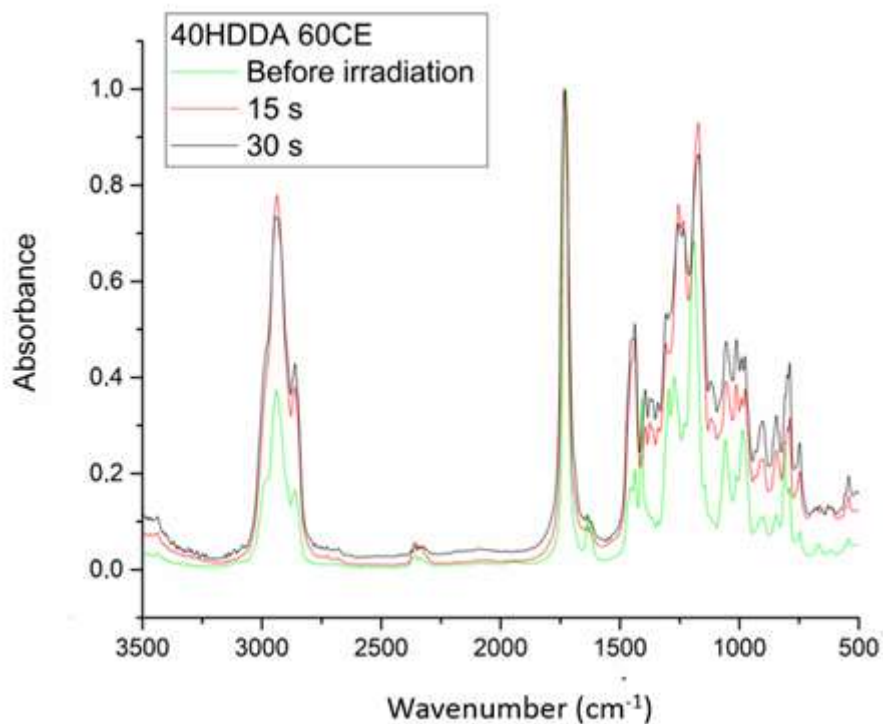

**Figure S5.** FT-IR spectra of the sample containing the highest amount of CE (40HDDA 60CE) at different irradiation times under visible light (15 and 30 seconds of visible light irradiation).

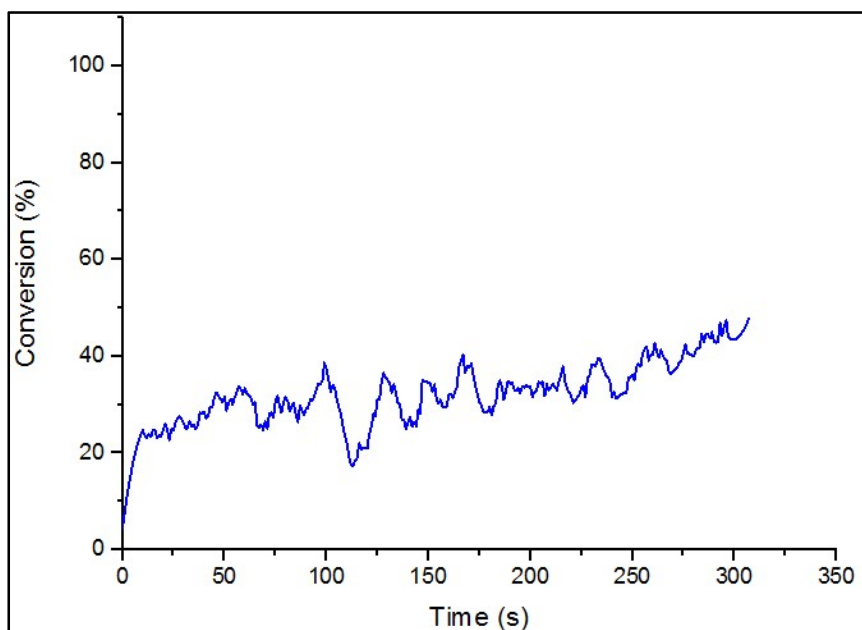

**Figure S6.** Epoxy groups conversion vs. time profile for 75HDDA25CE formulation.

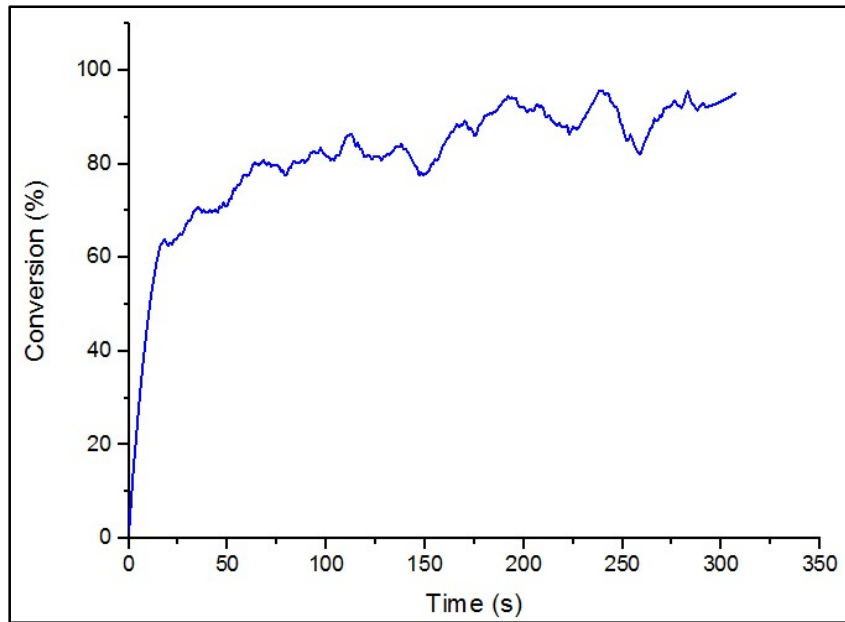

Figure S7. Epoxy groups conversion vs. time profile for 50HDDA50CE formulation.

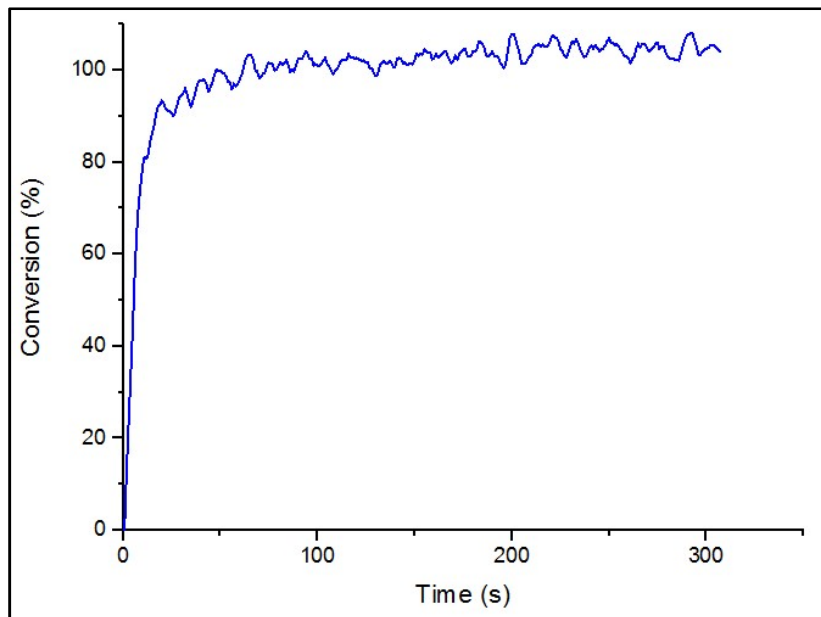

Figure S8. Epoxy groups conversion vs. time profile for 40HDDA60CE formulation.

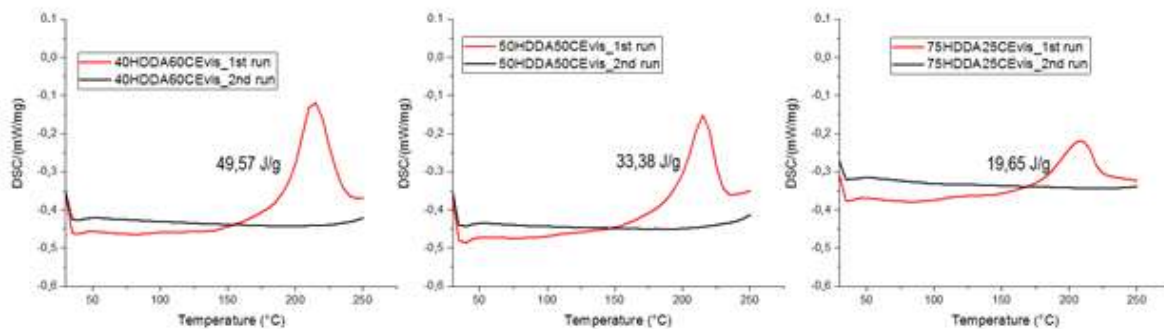

Figure S9. DSC plots obtained for the samples with increasing amount of CE after printing showing the different specific heat measured during the first heating cycle.

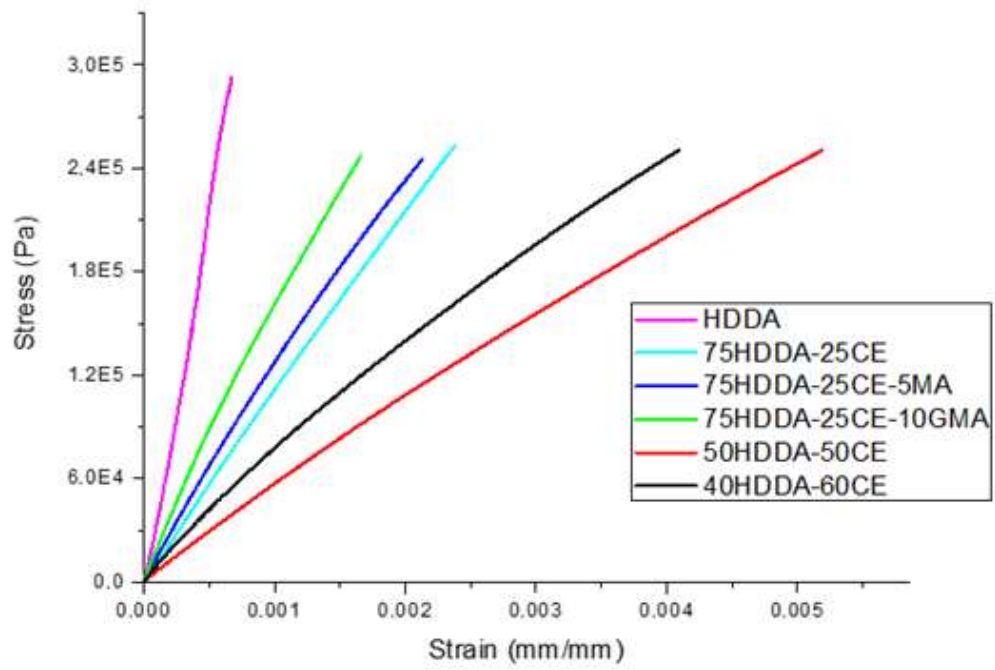

Figure S10. Stress-strain curves.
